# Supplementary material for: Invasions of non-native earthworms related to population declines of ground-nesting songbirds across a regional extent in northern hardwood forests of North America
Source: Springer Nature journal article supplement (doi:10.1007/s10980-012-9717-4), 2012-02-23
Supplement: MOESM1 [file 10980_2012_9717_MOESM1_ESM.doc]

**Supplementary Table 1. Model selection results for relationships with Ovenbird density at survey points in all hardwood forest types (*n*=124). Results are derived from Akaike’s Information Criteria, corrected for small samples (*AICc*).**

| Modela | *K*b | | *AICc* | | *ΔAICc*c | | ωid |
| --- | --- | --- | --- | --- | --- | --- | --- |
| Core forest (within 1,000m) | 3 | | -225.97 | | 0.00 | | 0.382 |
| Core forest (within 500m) | 3 | | -224.31 | | 1.66 | | 0.167 |
| Core forest (within 500m) + core forest (within 1,000m) | 4 | | -223.84 | | 2.14 | | 0.131 |
| Core forest (within 2,000m) | 3 | | -222.17 | | 3.80 | | 0.057 |
| Ground cover | 3 | | -221.92 | | 4.06 | | 0.050 |
| Core forest (within 200m) | 3 | | -221.17 | | 4.81 | | 0.034 |
| Canopy cover | 3 | | -220.79 | | 5.18 | | 0.029 |
| Sedge cover | 3 | | -220.71 | | 5.27 | | 0.027 |
| Null (intercept only) model | 2 | | -220.67 | | 5.31 | | 0.027 |
| Distance to forest edge | 3 | | -219.68 | | 6.30 | | 0.016 |
| Core forest (within 100m) | 3 | | -219.46 | | 6.52 | | 0.015 |
| Litter depth | 3 | | -219.41 | | 6.56 | | 0.014 |
| Shrub density | 3 | | -219.35 | | 6.63 | | 0.014 |
| Understory cover | 3 | | -219.13 | | 6.84 | | 0.012 |
| *Lumbricus* biomass | 3 | | -219.06 | | 6.91 | | 0.012 |
| Global model (all variables) | 15 | | -218.98 | | 6.99 | | 0.012 |
|  |  | |  | |  | |  |
| avariables included in model |  | |  | |  | |  |
| b number of parameters in model (includes parameters for intercept and overdispersion) | | |  | |  | |  |
| cdifference in *AICc* value between model and the most strongly supported model | | | | | | |  |
| d*AIC* weight - relative strength of support for model | |  | |  | |  |  |

**Supplementary Table 2. Model selection results for relationships with Ovenbird density at survey points in maple-basswood forests (*n*=53). Results are derived from Akaike’s Information Criteria, corrected for small samples (*AICc*).**

| Modela | *K*b | *AICc* | *ΔAICc*c | ωid |
| --- | --- | --- | --- | --- |
| *Lumbricus* biomass + ground cover | 4 | -95.93 | 0.00 | 0.277 |
| *Lumbricus* biomass | 3 | -95.47 | 0.46 | 0.220 |
| Ground cover | 3 | -93.77 | 2.16 | 0.094 |
| Canopy cover | 3 | -93.01 | 2.92 | 0.064 |
| Sedge cover | 3 | -92.84 | 3.09 | 0.059 |
| Null (intercept only) model | 2 | -92.79 | 3.14 | 0.057 |
| Core forest (within 500m) | 3 | -92.00 | 3.93 | 0.039 |
| Shrub density | 3 | -91.68 | 4.25 | 0.033 |
| Distance to forest edge | 3 | -91.29 | 4.64 | 0.027 |
| Core forest (within 1,000m) | 3 | -91.15 | 4.79 | 0.025 |
| Understory cover | 3 | -90.94 | 4.99 | 0.023 |
| Core forest (within 2,000m) | 3 | -90.84 | 5.09 | 0.022 |
| Litter depth | 3 | -90.73 | 5.20 | 0.021 |
| Core forest (within 200m) | 3 | -90.67 | 5.26 | 0.020 |
| Core forest (within 100m) | 3 | -90.56 | 5.37 | 0.019 |
| Global model (all variables) | 15 | -54.08 | 41.85 | 0.000 |
|  |  |  |  |  |
| avariables included in model | |  |  |  |
| bnumber of parameters in model (includes parameters for intercept and overdispersion) | | | |  |
| cdifference in *AICc* between model and the most strongly supported model | | | | |
| d*AIC* weight - relative strength of support for model | | |  |  |
